# Supplementary material
Source: PubMed Central journal article supplement (PMC3486100)
Supplement: JB.01085-12_zjb999092037so1.pdf [file JB.01085-12_zjb999092037so1.pdf]

## SUPPLEMENTAL MATERIAL

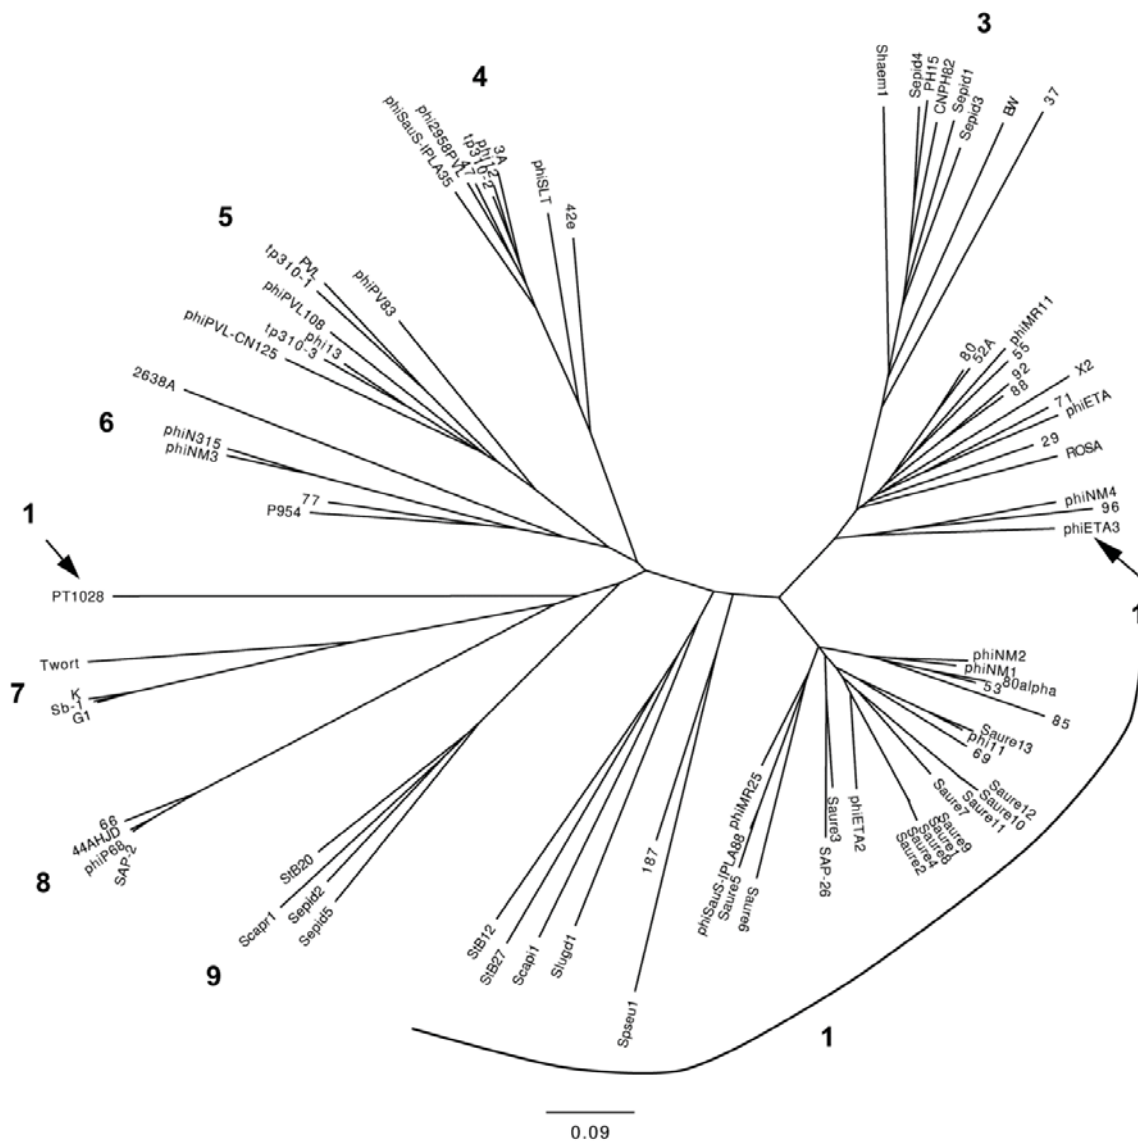

Figure S1: Neighbor Joining tree of the 85 staphylococcal phages and prophages based on the protein content. Numbers refer to the different clusters defined by the clustering method (Figure 6). Globally, both classifications are similar, except for the *S. aureus* phages phiETA3 and PT1028, which were found included in cluster 1 in figure 6. The main characteristics of the phages and prophages included in the analysis are given in Data set 1.

**Table S1: Primer sequences used for the determination of StB12, StB27 and StB20 integration sites in *S. hominis* T0C2HA1, T0C6HA2 and *S. capitis* R104 genomes, respectively**

| Primer                       | Sequence                        |
|------------------------------|---------------------------------|
| HominisLocus1 <sup>1,2</sup> | TAACAAGTGATATTACACACGCAGGAG     |
| StB12Int1 <sup>1</sup>       | GCTGAATTTATTCAAATGGCAATTAAG     |
| StB12G61_1 <sup>1</sup>      | GGACTTCTAGCAAATTATTTATTTAACC    |
| HominisLocus2 <sup>1,2</sup> | ATCTTTATTATTCCATGCTTCACGCCC     |
| StB27Int1 <sup>2</sup>       | ATCGAATATGTATTAGGTAAGAACGAC     |
| StB27Lys1 <sup>2</sup>       | GGAATAAGACAAATATCACCTACCCACAAGG |
| CapitisLocus1 <sup>3</sup>   | GAAGTATTCATTCCAAAACATTACATTACG  |
| StB20Int2 <sup>3</sup>       | AAGATGGCCATTAAGTCTATCGAC        |
| StB20Lys1 <sup>3</sup>       | AATACAGATAGTTTAGGTAAGTTGTGG     |
| CapitisLocus2 <sup>3</sup>   | ACTTTAACATCTGATTTACCTAATTG      |

<sup>1</sup> primers used for StB12 integration site determination

<sup>2</sup> primers used for StB27 integration site determination

<sup>3</sup> primers used for StB20 integration site determination

**Table S2: Genome annotation of StB12**

| ORF | Strand | Start..end | Size |      | Predicted function                           | NCBI best match<br>(extent , % aa identity, total length aa)                                                                                                                                                                  | Domain                                                         | Prot family<br>Func Annot<br>Mgld, MgeName, Hosts                                                                                                                         |
|-----|--------|------------|------|------|----------------------------------------------|-------------------------------------------------------------------------------------------------------------------------------------------------------------------------------------------------------------------------------|----------------------------------------------------------------|---------------------------------------------------------------------------------------------------------------------------------------------------------------------------|
|     |        |            | aa   | kDa  |                                              |                                                                                                                                                                                                                               |                                                                |                                                                                                                                                                           |
| 1   | -      | 30..1415   | 461  | 54,8 | integrase/serine site - specific recombinase | YP_254311, putative site-specific recombinase, <i>S. haemolyticus</i> JCSC1435 (347/461, 76%, 461)                                                                                                                            | PF00239: resolvase, N-terminal domain;<br>PF07508: recombinase | family:vir_proph:25<br>no functions assigned<br>mge:2149,<br>prophinder:46506, <i>S. haemolyticus</i> JCSC1435                                                            |
| 2   | -      | 1462..2100 | 212  | 24,5 | phage repressor                              | YP_873953, phage repressor protein, <i>Staphylococcus</i> phage phiNM (163/212, 77%, 212)                                                                                                                                     | PF01381: HTH_3, Cro and CI family;<br>PF00717:peptidase S24    | family:vir_proph:2588<br>phi:0000044 - transcriptional-regulation of phage gene expression<br>mge:2513,<br>prophinder:44868, <i>S. aureus</i> subsp. <i>aureus</i> Newman |
| 3   | +      | 2292.2546  | 84   | 9,99 | phage repressor                              | ZP_06930668.1, Gp5, <i>S. aureus</i> A8796 (50/81, 62%, 84)                                                                                                                                                                   | PF01381: HTH_3, Cro and CI family                              | family:vir_proph:10057<br>no functions assigned<br>mge:1662, phiNM, <i>S. aureus</i>                                                                                      |
| 4   | +      | 2686..3414 | 242  | 27,8 |                                              | YP_004708098.1 hypothetical protein CXIVA_10290, <i>Clostridium</i> sp. SY8519 (36/102, 35%, 336)<br>YP_302022.1, hypothetical protein SSP1932, <i>S. saprophyticus</i> subsp. <i>saprophyticus</i> ATCC 15305 (39/94,41%,86) | PF02195: ParBc, ParB like nuclease domain                      | family:vir_proph:595<br>go:0009008 - DNA-methyltransferase activity<br>mge:2764,<br>prophinder:46415,<br><i>Magnetococcus</i> sp. MC-1                                    |
| 5   | +      | 3429..3647 | 72   | 8,2  |                                              | no hits found                                                                                                                                                                                                                 |                                                                | no hits found                                                                                                                                                             |
| 6   | +      | 3647..4411 | 255  | 29,1 |                                              | YP_240190.1, ORF017, <i>Staphylococcus</i> phage EW (83/246, 34%, 256)                                                                                                                                                        | PF02195: ParBc, ParB like nuclease domain                      | family:vir_proph:2058<br>no functions assigned<br>mge:1642, EW, <i>S. aureus</i>                                                                                          |
| 7   | +      | 4478..4555 | 25   | 2,9  |                                              | no hits found                                                                                                                                                                                                                 |                                                                | no hits found                                                                                                                                                             |
| 8   | -      | 5009..4548 | 154  | 17,8 |                                              | ZP_07361801.1, conserved HP, <i>S. aureus</i> ATCC BAA-39 (51/147, 35%, 164)                                                                                                                                                  |                                                                | family:vir_proph:1226<br>no functions assigned<br>mge:2655,<br>prophinder:43224,<br><i>Streptococcus pyogenes</i> MGAS6180                                                |
| 9   | +      | 5066..5194 | 43   | 5,4  |                                              | no hits found                                                                                                                                                                                                                 |                                                                | no hits found                                                                                                                                                             |
| 10  | +      | 5172..5357 | 61   | 6,8  |                                              | YP_253711.1, HP SH1796, <i>S. haemolyticus</i> JCSC1435 (23/56, 42%, 56)                                                                                                                                                      |                                                                | family:vir_proph:6545<br>no functions assigned<br>mge:2148,                                                                                                               |

|    |   |            |     |      |                                                          |                                                                                                        |                                                                |                                                                                                                                                                                                               |
|----|---|------------|-----|------|----------------------------------------------------------|--------------------------------------------------------------------------------------------------------|----------------------------------------------------------------|---------------------------------------------------------------------------------------------------------------------------------------------------------------------------------------------------------------|
|    |   |            |     |      |                                                          |                                                                                                        |                                                                | prophinder:46504, <i>S. haemolyticus</i> JCSC1435                                                                                                                                                             |
| 11 | + | 5442..5642 | 66  | 7,5  |                                                          | YP_253710.1, HP SH1795, <i>S. haemolyticus</i> JCSC1435 (45/59, 77%, 91)                               |                                                                | family:vir_proph:6544<br>no functions assigned<br>mge:2148,<br>prophinder:46504, <i>S. haemolyticus</i> JCSC1435                                                                                              |
| 12 | + | 5690..6175 | 161 | 18,4 |                                                          | YP_003472493.1, HP SLGD_02278, <i>S. lugdunensis</i> HKU09-01 (142/161, 89%, 161)                      | PF05565: Siphon_Gp157                                          | family:vir_proph:87<br>phi:0000326 - phage<br>function unknown<br>mge:2683,<br>prophinder:43517, <i>Bacillus cereus</i> E33L                                                                                  |
| 13 | + | 6176..6838 | 220 | 25,5 | recombination protein, ERF-like recombinase*             | YP_002633573.1, HP Sca_0474, <i>S. carnosus</i> (170/216, 79%, 223)                                    | PF04404: ERF superfamily, DNA single-strand annealing proteins | family:vir_proph:1389<br>phi:0000326 - phage<br>function unknown, 580 -<br>ERF-like recombinase<br>mge:2148,<br>prophinder:46504, <i>S. haemolyticus</i> JCSC1435                                             |
| 14 | + | 6852..7271 | 139 | 15,6 | recombination protein, DNA single-strand binding protein | ZP_06612891.1, single-strand binding protein, <i>S. epidermidis</i> M23864:W2(grey) (85/140, 61%, 140) | PF00436: SSB, single-strand binding protein family             | family:vir_proph:30<br>go:000369 - single-stranded DNA binding<br>mge:1679, PH15, <i>S. epidermidis</i>                                                                                                       |
| 15 | + | 7283..7588 | 101 | 11,6 |                                                          | no hits found                                                                                          |                                                                | no hits found                                                                                                                                                                                                 |
| 16 | + | 7589..8266 | 225 | 26,0 |                                                          | YP_240873.1, ORF1, <i>Staphylococcus</i> phage X2 (178/222, 81%, 224)                                  | PF06147: DUF968, unknown function                              | family:vir_proph:66<br>phi:0000326 - phage<br>function unknown<br>mge:2643,<br>prophinder:45329, <i>S. aureus</i> subsp. <i>aureus</i> Mu3                                                                    |
| 17 | + | 8259..9053 | 264 | 31,0 | replication initiation protein                           | YP_185233.1, HP SCOL0341, <i>S. aureus</i> subsp. <i>aureus</i> COL (154/216, 72%, 266)                | PF09681: N-terminal phage replisome organiser                  | family:vir_proph:10<br>phi0000026 - phage DNA replication;<br>go:0006270 - DNA replication initiation;<br>go :0003677-DNA binding<br>mge:2122,<br>prophinder:45229, <i>S. aureus</i> subsp. <i>aureus</i> COL |
| 18 | + | 9059..9415 | 118 | 14,2 |                                                          | ZP_06612896.1, conserved HP, <i>S.</i>                                                                 |                                                                | family:vir_proph:738                                                                                                                                                                                          |

|    |   |              |     |      |          |                                                                                            |                                                        |                                                                                                                                       |
|----|---|--------------|-----|------|----------|--------------------------------------------------------------------------------------------|--------------------------------------------------------|---------------------------------------------------------------------------------------------------------------------------------------|
|    |   |              |     |      |          | <i>epidermidis</i> M23864:W2 (grey)(58/117, 50%, 117)                                      |                                                        | phi:0000326 - phage function unknown<br>mge:1571, CNPH82, <i>S. epidermidis</i>                                                       |
| 19 | + | 9402..10649  | 416 | 47,7 | helicase | YP_950645.1, putative DNA helicase, <i>Staphylococcal</i> phage CNPH82 (282/416, 68%, 416) | PF03796: DnaBC, DnaB like helicase C- term domain      | family:vir_proph:24<br>phi:0000026 - phage DNA replication, go:0004386 - helicase activity<br>mge:1571, CNPH82, <i>S. epidermidis</i> |
| 20 | + | 10649..10831 | 60  | 7,2  |          | YP_950714.1, HP ph52, <i>Staphylococcus</i> phage PH15 (22/47, 47%, 73)                    |                                                        | family:vir_proph :737<br>phi:0000326 - phage function unknown<br>mge:1571, CNPH82, <i>S. epidermidis</i>                              |
| 21 | + | 10847..11071 | 74  | 8,8  |          | YP_254291.1, HP SH2376, <i>S. haemolyticus</i> JCSC1435 (65/74, 88% )                      | PF11673: DUF3269, unknown function                     | family:vir_proph:185<br>phi:0000326 - phage function unknown<br>mge:2149, prophinder:46506, <i>S. haemolyticus</i> JCSC1435           |
| 22 | + | 11082..11408 | 108 | 12,1 |          | ZP_04679045.1, gp51, <i>S. warneri</i> L37603 (50/98, 52%, 103)                            | PF08774: VRR_NUC, restriction endonuclease-like domain | family:vir_proph:234<br>phi:0000326 - phage function unknown<br>mge:1850, B025, <i>Listeria monocytogenes</i>                         |
| 23 | + | 11395..11769 | 124 | 14,6 |          | YP_254286, HP SH2371, <i>S. haemolyticus</i> JCSC1435 (71/131, 55%, 132)                   |                                                        | family:vir_proph:29<br>phi:0000013 - phage release by lysis<br>mge:2149, prophinder:46506, <i>S. haemolyticus</i> JCSC1435            |
| 24 | + | 11769..11951 | 60  | 6,8  |          | YP_024543.1, ORF115, staphylococcal phage K (13/33, 40%, 117)                              |                                                        | no hits found                                                                                                                         |
| 25 | + | 11956..12159 | 67  | 8,0  |          | YP_003472483.1, HP SLGD_02268, <i>S. lugdunensis</i> HKI09-01 (35/46, 77%, 104)            |                                                        | no hits found                                                                                                                         |
| 26 | + | 12156..12617 | 154 | 18,0 |          | YP_240214.1, ORF46, <i>Staphylococcus</i> phage EW (63/70, 90%, 102)                       | PF11753: DUF3310, unknown function                     | family:vir_proph:61<br>phi:0000326 - phage function unknown<br>mge:1642, EW, <i>S. aureus</i>                                         |
| 27 | + | 12610..12912 | 100 | 12,1 |          | YP_189126.1, HP SERP1561, <i>S. epidermidis</i> RP62A (53/92, 58%, 94)                     |                                                        | family:vir_proph:7031<br>no functions assigned                                                                                        |

|    |   |              |     |      |          |                                                                                 |                                            |                                                                                                                                          |
|----|---|--------------|-----|------|----------|---------------------------------------------------------------------------------|--------------------------------------------|------------------------------------------------------------------------------------------------------------------------------------------|
|    |   |              |     |      |          |                                                                                 |                                            | mge:2262 - prophinder:43410<br><i>S. epidermidis</i> RP62A                                                                               |
| 28 | + | 12915..13628 | 238 | 28,4 |          | ZP_04797554.1S, conserved HP, <i>S. epidermidis</i> W23144 (116/230, 51%, 243)  | PF13392: HNH_3, HNH endonuclease           | family:vir_proph:5009<br>no functions assigned<br>MGE: mge:1571, CNPH82<br><i>S. epidermidis</i>                                         |
| 29 | + | 13628..13813 | 61  | 7,1  |          | ZP_04824904.1, conserved HP, <i>S. epidermidis</i> BCM-HMP0060(51/60, 85%, 65)  |                                            | family:vir_proph:3305<br>no functions assigned<br>mge:1571, CNPH82<br><i>S. epidermidis</i>                                              |
| 30 | + | 13810..14217 | 135 | 15,7 |          | YP_240139.1, ORF27 <i>Staphylococcus</i> phage 37(70/151, 47%, 154)             | PF09643: YopX protein                      | family:vir_proph:29<br>phi:000013- phage release by lysis<br>mge:1602, 37, <i>S. aureus</i>                                              |
| 31 | + | 14218..14562 | 114 | 13,2 | nuclease | ZP_04824908.1, nuclease, <i>S. epidermidis</i> BCM-HMP0060 (98/114, 86%, 114)   | PF00565: staphylococcal nuclease homologue | family:vir_proph:158<br>go:0004530 - deoxyribonuclease I activity<br>mge:1571, CNPH82, <i>S. epidermidis</i>                             |
| 32 | + | 14567..14869 | 100 | 11,8 |          | ZP_04824909.1, conserved HP, <i>S. epidermidis</i> BCM-HMP0060 (37/48, 78%, 50) |                                            | family:vir_proph:153<br>phi:0000326 - phage function unknown<br>mge:2642,<br>prophinder:45328, <i>S. aureus</i> subsp. <i>aureus</i> Mu3 |
| 33 | + | 14862..15107 | 81  | 9,4  |          | no hits found                                                                   |                                            | no hits found                                                                                                                            |
| 34 | + | 15108..15653 | 181 | 20,9 | dUTPase  | ZP_05690702.1, conserved HP, <i>S. aureus</i> A8115 (118/187, 64%, 179)         | PF08761: dUTPase 2                         | family:vir_proph:144<br>phi:0000326 - phage function unknown<br>mge:1607, 69, <i>S. aureus</i>                                           |
| 35 | + | 15693..15896 | 67  | 8,1  |          | YP_253700.1, HP SH1785, <i>S. haemolyticus</i> JCSC1435 (31/38, 82%, 74)        | PF07129: DUF1381, unknown function         | family:vir_proph:99<br>phi:0000326 - phage function unknown<br>mge:2148,<br>prophinder:46504, <i>S. haemolyticus</i> JCSC1435            |
| 36 | + | 15909..16187 | 92  | 10,4 |          | no hits found                                                                   |                                            | no hits found                                                                                                                            |
| 37 | + | 16180..16347 | 55  | 6,5  | RinB     | YP_254279.1, HP SH2364, <i>S. haemolyticus</i> JCSC1435 (41/54, 76%, 52)        | PF06116:transcriptional activator RinB     | family:vir_proph:83<br>go:0016563 - transcription                                                                                        |

|    |   |              |     |      |                              |                                                                                              |                                              |                                                                                                                                                                          |                                                                                                                                                                                          |
|----|---|--------------|-----|------|------------------------------|----------------------------------------------------------------------------------------------|----------------------------------------------|--------------------------------------------------------------------------------------------------------------------------------------------------------------------------|------------------------------------------------------------------------------------------------------------------------------------------------------------------------------------------|
|    |   |              |     |      |                              |                                                                                              |                                              |                                                                                                                                                                          | activator activity, phi:0000007 - phage lysogeny, phi:0000049 - positive transcriptional regulation of phage gene expression mge:2149, prophinder:46506, <i>S. haemolyticus</i> JCSC1435 |
| 38 | + | 16347..16790 | 147 | 17,4 |                              | ZP_06614644.1, conserved HP, <i>S. epidermidis</i> M23864:W2 (grey) (66/145, 46%, 140)       |                                              | family:vir_proph:1192 phi:0000326 - phage function unknown mge:1571, CNPH82, <i>S. epidermidis</i>                                                                       |                                                                                                                                                                                          |
| 39 | + | 16787..16864 | 25  | 3,0  |                              | no hits found                                                                                |                                              | no hits found                                                                                                                                                            |                                                                                                                                                                                          |
| 40 | + | 16915..17316 | 133 | 15,6 |                              | NP_510932.1, ORF38, <i>Staphylococcus</i> phage phiETA (98/133, 74%, 133)                    |                                              | family:vir_proph:325 phi:0000326 - phage function unknown mge:1475, 55, <i>S. aureus</i>                                                                                 |                                                                                                                                                                                          |
| 41 | + | 17313..17528 | 71  | 8,5  |                              | no hits found                                                                                |                                              | no hits found                                                                                                                                                            |                                                                                                                                                                                          |
| 42 | + | 17547..18038 | 164 | 18,6 | TerS                         | YP_240669.1, orf28, <i>Staphylococcus</i> phage 88 (129/159,82%, 162)                        | PF03592: terminase 2,terminase small subunit | family:vir_proph:45 phi:0000074 - phage terminase small subunit, phi:0000019 - phage DNA maturation, go:0003677 - DNA binding (by ariane) mge:1676, 92, <i>S. aureus</i> |                                                                                                                                                                                          |
| 43 | + | 18022..19323 | 434 | 50,8 | TerL                         | YP_417188.1, terminase large subunit, <i>S. aureus</i> RF122 (338/425,80% ,429)              | PF04466: terminase 3,terminase large subunit | family:vir_proph:15 phi:0000019 - phage DNA maturation phi:0000073 - phage terminase large subunit mge:2670, prophinder:45952, <i>S. aureus</i> RF122                    |                                                                                                                                                                                          |
| 44 | + | 19340..20818 | 492 | 57,7 | portal protein, SPP1 family* | ZP_03614346.1, phage portal protein, SPP1 family, <i>S. capitis</i> SK14 (431/473, 92%, 498) |                                              | family:vir_proph:52 phi:0000012 - phage head tail joining, phi:0000068 - phage portal protein (by ariane) mge:1662, phiNM, <i>S. aureus</i>                              |                                                                                                                                                                                          |

|    |   |              |     |      |                                   |                                                                                                         |                                                    |                                                                                                                                                                         |
|----|---|--------------|-----|------|-----------------------------------|---------------------------------------------------------------------------------------------------------|----------------------------------------------------|-------------------------------------------------------------------------------------------------------------------------------------------------------------------------|
| 45 | + | 20815..22317 | 501 | 58,5 | minor head protein*               | ZP_3614353.1, phage head morphogenesis protein, SPP1 family, <i>S. capitis</i> SK14 (137/314, 44%, 316) | PF04233 :Phage Mu F, putative minor head protein   | family:vir_proph:50<br>phi:0000185 - phage head/capsid minor protein<br>mge:1557, 187, <i>S. aureus</i>                                                                 |
| 46 | + | 22321..22473 | 50  | 5,8  |                                   | YP_001850461.1, HP, <i>S. capitis</i> SK14 (25/43, 59%, 181)                                            |                                                    | no hits found                                                                                                                                                           |
| 47 | + | 22466..22615 | 49  | 5,7  |                                   | ZP_3614379, HP STACA0001_2036, <i>S. capitis</i> SK14 (25/39, 65%, 47)                                  |                                                    | no hits found                                                                                                                                                           |
| 48 | + | 22860..23381 | 174 | 20,3 | scaffold protein                  | ZP_03614352.1, putative scaffold protein, <i>S. capitis</i> SK14 (80/166,49%, 204)                      |                                                    | family:vir_proph:103<br>phi:0000017 - phage prohead/capsid assembly,<br>phi:0000065 - phage scaffolding protein<br>mge:1510, phiJL-1,<br><i>Lactobacillus plantarum</i> |
| 49 | + | 23486..24463 | 326 | 36,9 | major head protein*               | YP_873992.1, head protein, <i>Staphylococcus</i> phage phiNM (222/322, 69%, 324)                        | PF05065: phage capsid family                       | family:vir_proph:110<br>phi:0000066 - phage head/capsid major protein<br>mge:2670,<br>prophinder:45952, <i>S. aureus</i><br>RF122                                       |
| 50 | + | 24489..24758 | 89  | 10,2 |                                   | ZP_03614372.1, conserved HP, <i>S. capitis</i> SK14 (78/89, 88%, 89)                                    |                                                    | family:vir_proph:107<br>phi:0000326 - phage function unknown<br>mge:2430,<br>prophinder:45292, <i>S. aureus</i><br>subsp. <i>aureus</i> JH1                             |
| 51 | + | 24760..25086 | 109 | 12,5 | DNA packaging, minor head protein | ZP_03614383.1, conserved HP, <i>S. capitis</i> SK14 (100/109, 92%, 109)                                 | PF05135: phage QLRG family, putative DNA packaging | family:vir_proph:160<br>phi:0000186 - minor capsid structural protein<br>mge:2670,<br>prophinder:45952, <i>S. aureus</i><br>RF122                                       |
| 52 | + | 25086..25388 | 100 | 11,8 | minor head protein                | ZP_03614351.1, conserved HP, <i>S. capitis</i> SK14 (88/93, 95%, 93)                                    |                                                    | family:vir_proph:277<br>phi:0000186 - minor capsid structural protein<br>mge:1662, phiNM, <i>S. aureus</i>                                                              |
| 53 | + | 25388..25753 | 121 | 14,0 |                                   | ZP_03614378.1, HK97 gp10 family, <i>S. capitis</i> SK14 (75/113, 67%, 119)                              | PF04883 : DUF646, possible tail component          | family:vir_proph:76<br>phi:0000326 - phage function unknown<br>mge:2643,<br>prophinder:45329, <i>S. aureus</i>                                                          |



|    |   |              |          |      |                                    |                                                                                             |                                                                                                     |                                                                                                                                                                        |
|----|---|--------------|----------|------|------------------------------------|---------------------------------------------------------------------------------------------|-----------------------------------------------------------------------------------------------------|------------------------------------------------------------------------------------------------------------------------------------------------------------------------|
| 54 | + | 25754..26143 | 129      | 14,8 | head structural protein            | ZP_03614357.1, HP, <i>S. capitis</i> SK14 (98/129, 76%, 129)                                |                                                                                                     | subsp. <i>aureus</i> Mu3<br>family:vir_proph:215<br>phi:0000173 - major capsid structural protein<br>mge:2670,<br>prophinder:45952, <i>S. aureus</i> RF122             |
| 55 | + | 26190..26735 | 181      | 20,3 | major tail protein*                | ZP_03614344.1, phage major tail protein, <i>S. capitis</i> SK14 (150/180, 84%,184)          | PF06199 : phage tail2                                                                               | family:vir_proph:196<br>phi:0000082 - phage major tail protein<br>mge:1557, 187, <i>S. aureus</i>                                                                      |
| 56 | + | 26801..27166 | 121      | 13,6 | tail assembly protein              | YP_003472460.1, HP, <i>S. lugdunensis</i> HKU09-01 (66/111, 60%, 121)                       | PF12363 : phage protein                                                                             | family:vir_proph:209<br>phi:0000015 - phage tail assembly<br>mge:1613, 53, <i>S. aureus</i>                                                                            |
| 57 | + | 27208..27555 | 115      | 13,6 |                                    | ZP_03614371.1, conserved HP, <i>S. capitis</i> SK14 (82/113, 72%, 114)                      |                                                                                                     | family:vir_proph:210<br>phi:0000326 - phage function unknown<br>mge:1607, 69, <i>S. aureus</i>                                                                         |
| 58 | + | 27568..31065 | 116<br>5 | 86,6 | tail tape measure protein          | ZP_0361436.01, phage tail tape measure protein, <i>S. capitis</i> SK14 (509/774, 66%, 1320) | PF01576: myosine tail contractile prot/SMC_prokA/COG541 2 (phage related protein, unknown function) | family:vir_proph:1<br>phi:0000086 - phage tail tape measure protein<br>mge:2149, prophinder : 46506, <i>S. haemolyticus</i> JCSC1435                                   |
| 59 | + | 31078..32034 | 318      | 37,3 | minor tail protein*                | ZP_03614373.1, conserved HP, <i>S. capitis</i> SK14 (215/317, 68%, 318)                     | PF05709: siphon tail, phage tail protein                                                            | family:vir_proph:190<br>phi:0000178 - phage minor tail protein<br>mge:1654, 85, <i>S. aureus</i>                                                                       |
| 60 | + | 32044..33291 | 416      | 47,0 | tail protein, endopeptidase*       | ZP_03614382.1, conserved phage protein, <i>S. capitis</i> SK14 (221/378, 59%, 486)          | PF06605.6: prophage endopeptidase tail                                                              | family:vir_proph:35<br>phi:0000178 - phage minor tail protein, go:0016298- lipase activity<br>mge:2430,<br>prophinder:45258, <i>S. aureus</i> subsp. <i>aureus</i> JH1 |
| 61 | + | 33305..35239 | 645      | 74,2 | tail protein, Zn carboxypeptidase* | ZP_03614336.1, zinc carboxypeptidase family, <i>S. capitis</i> SK14 (428/601, 72%, 628)     | PF00246: peptidase_M14, Zn carboxypeptidase                                                         | family:vir_proph:458<br>phi:0000178 - phage minor tail protein<br>mge:1602, 37, <i>S. aureus</i>                                                                       |
| 62 | + | 35427..36384 | 318      | 36,0 | tail protein, likely tail fiber*   | ZP_03614350.1, conserved HP, <i>S. capitis</i> SK14 (171/307, 56%, 395)                     | PF10651: DUF2479, unknown function                                                                  | family:vir_proph:69<br>phi:0000178 - phage minor                                                                                                                       |

|    |   |              |     |      |                                                   |                                                                                                                    |                                                                              |                                                                                                                                                                       |
|----|---|--------------|-----|------|---------------------------------------------------|--------------------------------------------------------------------------------------------------------------------|------------------------------------------------------------------------------|-----------------------------------------------------------------------------------------------------------------------------------------------------------------------|
|    |   |              |     |      |                                                   |                                                                                                                    |                                                                              | tail protein<br>mge:2149,<br>prophinder:46506, <i>S.</i><br><i>haemolyticus</i> JCSC1435                                                                              |
| 63 | + | 36405..36896 | 163 | 18,4 | holin                                             | YP_0025600381.1, holin, <i>Macrococcus caseolyticus</i> JCSC5402 (82/152, 54%, 170)                                | PF05105: phage holin 4                                                       | family:vir_proph:42<br>phi:0000088 - phage base plate protein,<br>go:0034290- holin activity<br>mge:1669_66, <i>S. aureus</i>                                         |
| 64 | + | 36946..37065 | 39  | 4,2  | peptidoglycan hydrolase, tail associated protein* | ZP_03614366.1, mannosyl-glycoprotein endo-beta-N-acetylglucosaminidase, <i>S. capitis</i> SK14                     |                                                                              | family:vir_proph:6<br>phi:0000013 - phage release by lysis, phi:0000340- phage cell wall amidase activity<br>mge:1602, 37, <i>S. aureus</i>                           |
| 65 | + | 37304..37543 | 79  | 9,1  | peptidoglycan hydrolase, tail associated protein* | ZP_03614366.1, mannosyl-glycoprotein endo-beta-N-acetylglucosaminidase, <i>S. capitis</i> SK14                     | PF05257: CHAP domain                                                         | family:vir_proph:6<br>phi:0000013 - phage release by lysis, phi:0000340- phage cell wall amidase activity<br>mge:2670,<br>prophinder:45952, <i>S. aureus</i><br>RF122 |
| 66 | + | 37916..39436 | 506 | 57,2 | peptidoglycan hydrolase, tail associated protein* | ZP_03614366.1, mannosyl-glycoprotein endo-beta-N-acetylglucosaminidase, <i>S. capitis</i> SK14 (288/501, 58%, 626) | PF01832: glucosaminidase                                                     | family:vir_proph:6<br>phi:0000013 - phage release by lysis, phi:0000340- phage cell wall amidase activity<br>mge:1613, 53, <i>S. aureus</i>                           |
| 67 | + | 39489..40533 | 348 | 38,4 | tail protein, likely tail fiber*                  | ZP_06612939.1, tail fiber protein, <i>S. epidermidis</i> M23864:W2(grey) (160/396, 41%, 384)                       | PF10651: DUF2479, unknown function;<br>PF01391: collagen triple helix repeat | family:vir_proph:199<br>phi:0000178 - phage minor tail protein<br>mge:1571, CNPH82, <i>S. epidermidis</i>                                                             |
| 68 | + | 40549..40893 | 114 | 13,2 |                                                   | ZP_06614673.1, conserved HP, <i>S. epidermidis</i> M23864:W2(grey) (86/114, 76%, 114)                              |                                                                              | family:vir_proph:1391<br>phi:0000326 - phage function unknown<br>mge:1571, CNPH82 <i>S. epidermidis</i>                                                               |
| 69 | + | 40886..41029 | 47  | 5,8  |                                                   | ZP_06614674.1, conserved HP, <i>S. epidermidis</i> M23864:W2(grey) (37/42, 89%, 48)                                | PF09693: phage XkdX uncharacterized protein                                  | family:vir_proph:1045<br>phi:0000326 - phage function unknown<br>mge:1571, CNPH82, <i>S. epidermidis</i>                                                              |
| 70 | + | 41088..41708 | 206 | 23,3 |                                                   | ZP_06612936.1, conserved HP, <i>S.</i>                                                                             | PF05908: DUF867,                                                             | family:vir_proph:1435                                                                                                                                                 |

|    |   |              |     |      |       |                                                                            |                                                                                                         |                                                                                                                                                                                         |
|----|---|--------------|-----|------|-------|----------------------------------------------------------------------------|---------------------------------------------------------------------------------------------------------|-----------------------------------------------------------------------------------------------------------------------------------------------------------------------------------------|
|    |   |              |     |      |       | <i>epidermidis</i> M23864:W2(grey) (106/203, 53%, 211)                     | unknown function                                                                                        | phi:0000326 - phage function unknown<br>mge:125, SPP1, <i>Bacillus subtilis</i>                                                                                                         |
| 71 | + | 41762..42056 | 97  | 10,9 | holin | YP_415770.1, phage related holin, <i>S. aureus</i> RF122 (68/95, 72%, 100) | PF04688: phage holin                                                                                    | family:vir_proph:23<br>phi:0000013 - phage release by lysis, go:0034290 - holin activity<br>mge:2669, prophinder:45944, <i>S. aureus</i> RF122                                          |
| 72 | + | 42066..43518 | 483 | 54,4 | lysin | YP_040898.1, amidase, <i>S. aureus</i> MRSA252 (338/485, 70%, 484)         | PF05257: CHAP domain; PF01520: amidase_3 domain, N-acetylmuramoyl-L-alanine amidase; PF08460:SH3 domain | family:vir_proph:6<br>phi:0000013 - phage release by lysis, phi:0000340 - phage cell wall amidase activity<br>mge:2273, prophinder:43713, <i>S. aureus</i> subsp. <i>aureus</i> MRSA252 |
| 73 | + | 43788..44190 | 133 | 15,3 |       | YP_239892, ORF031, <i>Staphylococcus</i> phage 42E (44/137, 33%, 141)      |                                                                                                         | family:vir_proph:3349<br>no functions assigned<br>mge:1643, 42e, <i>S. aureus</i>                                                                                                       |
| 74 | + | 44192..44597 | 134 | 15,8 |       | ZP_04824950, HP, <i>S. epidermidis</i> BCM-HMP0060 (31/83, 38%, 111)       |                                                                                                         | family:vir_proph:3348<br>no functions assigned<br>mge:1588,71, <i>S. aureus</i>                                                                                                         |

\*Proteins identified in proteomic analysis

**Table S3: Genome annotation of StB27**

| ORF | Strand | Start..end | Size |      | Predicted function        | NCBI best match<br>(extent , % aa identity, total length aa)                                                      | Domain                                                                  | Prot family<br>Func Annot<br>Mgeld, MgeName, Hosts                                                                                                                                                                                           |
|-----|--------|------------|------|------|---------------------------|-------------------------------------------------------------------------------------------------------------------|-------------------------------------------------------------------------|----------------------------------------------------------------------------------------------------------------------------------------------------------------------------------------------------------------------------------------------|
|     |        |            | aa   | kDa  |                           |                                                                                                                   |                                                                         |                                                                                                                                                                                                                                              |
| 1   | -      | 30..1415   | 461  | 54,8 | integrase                 | YP_254311.1, putative site-specific recombinase, <i>S. haemolyticus</i> JCSC1435 (346/461, 75%, 461)              | PF00239: Resolvase;<br>PF07508:<br>Recombinase                          | family:vir_proph:25<br>phi:0000330 - site-specific DNA inversion;<br>phi:0000056 - prophage DNA integration;<br>phi:0000144 - serine-based site-specific recombinase activity<br>mge:2149, prophinder:46506, <i>S. haemolyticus</i> JCSC1435 |
| 2   | -      | 1610..2353 | 281  | 29,1 |                           | YP_001247418.1, hypothetical protein SaurJH9_2059, <i>S. aureus</i> subsp. <i>aureus</i> JH9 (118/232, 51%, 245)  | PF02452: PemK                                                           | family:vir_proph:449<br>phi:0000326 - phage function unknown<br>mge:2334, prophinder:45294, <i>S. aureus</i> subsp. <i>aureus</i> JH9                                                                                                        |
| 3   | -      | 2476..3558 | 360  | 39,1 | *                         | YP_240704.1, ORF012, <i>Staphylococcus</i> phage 88 (124/218, 57%, 309)                                           |                                                                         | family:vir_proph:227<br>phi:0000326 - phage function unknown<br>mge:1508, 88, <i>S. aureus</i>                                                                                                                                               |
| 4   | -      | 3581..4039 | 152  | 17,8 |                           | YP_002633564.1, hypothetical protein Sca_0465, <i>S. carnosus</i> subsp. <i>carnosus</i> TM300 (83/150, 55%, 154) | DUF955 : domain of unknown function (HEXXH domain)                      | family:vir_proph:149<br>phi:0000326 - phage function unknown<br>mge:1571, CNPH82, <i>S. epidermidis</i>                                                                                                                                      |
| 5   | -      | 4044..4316 | 104  | 12,3 | transcriptional regulator | NP_371375.1, hypothetical protein SAV0851, <i>S. aureus</i> subsp. <i>aureus</i> Mu50 (49/65, 75%, 109)           | PF01381:HTH3, Cro and CI family                                         | family:vir_proph:12<br>phi:0000057 - maintenance of prophage immunity; go:0016564 - transcription repressor activity<br>mge:2493, prophinder:43758, <i>S. aureus</i> subsp. <i>aureus</i> MSSA476                                            |
| 6   | +      | 4537..4728 | 66   | 7,1  | transcriptional regulator | YP_043025.1, putative phage regulatory protein, <i>S. aureus</i> subsp. <i>aureus</i> MSSA476 (43/63, 65%, 66)    | PF01381:HTH3, Cro and CI family                                         | family:vir_proph:749<br>go:0016564 - transcription repressor activity<br>mge:2684, prophinder:45205, <i>S. aureus</i> subsp. <i>aureus</i> USA300                                                                                            |
| 7   | +      | 4780..5499 | 239  | 27,7 | transcriptional regulator | YP_240864.1, ORF016, <i>Staphylococcus</i> phage X2 (158/237, 67%, 235)                                           | PF02498: Bro-N, Bro family, N-terminal domain;<br>PF10552: ORF6C domain | family:vir_proph:3<br>go:0016564 - transcription repressor activity mge:1549, X2, <i>S. aureus</i>                                                                                                                                           |
| 8   | +      | 5500..5631 | 43   | 5,4  |                           | no hits found                                                                                                     |                                                                         | no hits found                                                                                                                                                                                                                                |

|    |   |              |     |      |                                                           |                                                                                                           |                                                             |                                                                                                                                                                                                                |
|----|---|--------------|-----|------|-----------------------------------------------------------|-----------------------------------------------------------------------------------------------------------|-------------------------------------------------------------|----------------------------------------------------------------------------------------------------------------------------------------------------------------------------------------------------------------|
| 9  | + | 5621..5839   | 72  | 8,7  |                                                           | no hits found                                                                                             |                                                             | no hits found                                                                                                                                                                                                  |
| 10 | + | 5852..6022   | 56  | 6,3  |                                                           | YP_253711.1, hypothetical protein SH1796, <i>S. haemolyticus</i> JCSC1435 (23/56, 41%, 56)                |                                                             | family:vir_proph:6545<br>no functions assigned<br>mge:2148, prophinder:46504, <i>S. haemolyticus</i> JCSC1435                                                                                                  |
| 11 | + | 6025..6312   | 95  | 11,4 | transcriptional regulator                                 | ZP_01795715.1, hypothetical protein CGSHill_00287, <i>Haemophilus influenzae</i> PittII (83/95, 87%, 95)  | PF01381: HTH3, Cro and CI family                            | family:vir_proph:4463<br>no functions assigned<br>mge:2670, prophinder:45952, <i>S. aureus</i> RF122                                                                                                           |
| 12 | + | 6395..6625   | 76  | 9,1  |                                                           | ZP_07841349.1, conserved hypothetical protein, <i>S. caprae</i> C87 (58/68, 85%, 70)                      |                                                             | family:vir_proph:6544<br>no functions assigned<br>mge:2148, prophinder:46504, <i>S. haemolyticus</i> JCSC1435                                                                                                  |
| 13 | + | 6625..8574   | 649 | 75,1 | recombination protein, exonuclease*                       | ZP_06336108.1, conserved hypothetical protein, <i>S. aureus</i> A9765 (439/647, 68%, 647)                 |                                                             | family:vir_proph:108<br>phi:0000129 - DNA recombination;<br>go:0004530 - deoxyribonuclease I activity<br>mge:2274, prophinder:43714, <i>S. aureus</i> subsp. <i>aureus</i> MRSA252                             |
| 14 | + | 8608..9498   | 296 | 33,7 | recombination protein, DNA single-strand binding protein* | CBI49855.1, RecT family phage protein, <i>S. aureus</i> subsp. <i>aureus</i> TW20 (244/296, 82%, 306)     | PF03837 : RecT family, DNA single-strand annealing proteins | family:vir_proph:71<br>go:0000739 - DNA strand annealing activity; phi:0000130 - homologous DNA recombination; RedB-like recombinase<br>mge:2256, prophinder:42793, <i>S. aureus</i> subsp. <i>aureus</i> N315 |
| 15 | + | 9710..10201  | 163 | 18,5 |                                                           | NP_646739.1, hypothetical protein MW1922, <i>S. aureus</i> subsp. <i>aureus</i> MW2 (129/160, 81%, 161)   |                                                             | family:vir_proph:347<br>phi:0000326 - phage function unknown<br>mge:2144, prophinder:45312, <i>S. aureus</i> subsp. <i>aureus</i> MW2                                                                          |
| 16 | + | 10198..10791 | 197 | 22,6 |                                                           | YP_001429787.1, hypothetical protein 0305phi8-36p061, <i>Bacillus</i> phage 0305phi8-36 (24/75, 32%, 248) |                                                             | family:vir_proph:1076<br>phi:0000326 - phage function unknown<br>mge:1892, <i>Geobacillus</i> virus E2, <i>Geobacillus</i>                                                                                     |
| 17 | + | 10803..11267 | 154 | 17,2 | DNA single-strand binding protein                         | ZP_06930763.1 single-stranded DNA-binding protein, <i>S. aureus</i> A8796 (114/158, 72%, 156)             | PF00436 : SSB                                               | family:vir_proph:30<br>go:0003697 - single-stranded DNA binding<br>mge:2274, prophinder:43714, <i>S. aureus</i> subsp. <i>aureus</i> MRSA252                                                                   |
| 18 | + | 11282..11485 | 67  | 7,7  |                                                           | YP_240206.1, ORF084, <i>Staphylococcus</i> phage EW (38/65, 58%, 68)                                      | PF01381: HTH3                                               | family:vir_proph:1191<br>phi:0000044 - transcriptional-regulation of phage gene expression<br>mge:1642, EW, <i>S. aureus</i>                                                                                   |

|    |   |              |     |      |                                              |                                                                                                                            |                                             |                                                                                                                                                                                                              |
|----|---|--------------|-----|------|----------------------------------------------|----------------------------------------------------------------------------------------------------------------------------|---------------------------------------------|--------------------------------------------------------------------------------------------------------------------------------------------------------------------------------------------------------------|
| 19 | + | 11482..11679 | 65  | 7,5  | transcriptional regulator                    | ZP_06612894.1, DNA-binding protein, <i>S. epidermidis</i> M23864:W2(grey) (39/64, 61%, 73)                                 | PF01381:HTH3                                | family:vir_proph:1191<br>phi:0000044 - transcriptional-regulation of phage gene expression<br>mge:1642, EW, <i>S. aureus</i>                                                                                 |
| 20 | + | 11714..12601 | 295 | 35,5 | DNA replication protein                      | YP_002560316.1, hypothetical protein MCCL_0913, <i>Macrococcus caseolyticus</i> JCSC5402 (174/297, 59%,296)                | PF07261: DnaB2                              | family:vir_proph:10<br>go:0006270 - DNA replication initiation;<br>phi:0000026 - phage DNA replication;<br>go:0003677 - DNA binding<br>mge:2144, prophinder:45312, <i>S. aureus</i> subsp. <i>aureus</i> MW2 |
| 21 | + | 12594..12818 | 74  | 8,2  |                                              | no hits found                                                                                                              |                                             | no hits found                                                                                                                                                                                                |
| 22 | + | 12964..13209 | 81  | 9,4  |                                              | AAC28960.2, orf10 pathogenicity island protein, <i>S. aureus</i> , (36/71, 51%, 97)                                        |                                             | family:vir_proph:6426<br>no functions assigned<br>mge:2121, prophinder:45224, <i>S. aureus</i> subsp. <i>aureus</i> COL                                                                                      |
| 23 | + | 13206..13493 | 95  | 10,7 |                                              | no hits found                                                                                                              |                                             | no hits found                                                                                                                                                                                                |
| 24 | + | 13486..13653 | 55  | 6,3  | RinB                                         | YP_240450.1, ORF144, <i>Staphylococcus</i> phage 71 (35/50, 70%, 57)                                                       | PF06116 : RinB                              | family:vir_proph:83<br>phi:0000049 - positive transcriptional regulation of phage gene expression<br><br>mge:1588, 71, <i>S. aureus</i>                                                                      |
| 25 | + | 13650..14096 | 148 | 17,5 |                                              | ZP_06614644.1, conserved hypothetical protein, <i>S. epidermidis</i> M23864:W2(grey) (68/145, 47%, 140)                    |                                             | family:vir_proph:1192<br>phi:0000326 - phage function unknown<br>mge:1571, CNPH82, <i>S. epidermidis</i>                                                                                                     |
| 26 | + | 14167..14664 | 165 | 19,1 | Holliday junction-specific endonuclease RecU | BAH18242.1, conserved hypothetical protein, <i>M. caseolyticus</i> JCSC5402 (72/160, 45%, 170)                             | PF03838: RecU                               | family:vir_proph:1313<br>go:0008821 - crossover junction endodeoxyribonuclease activity<br>mge:1567, GBSV1, <i>Geobacillus</i> sp. 6k51                                                                      |
| 27 | + | 14664..15071 | 135 | 16,3 |                                              | YP_240149.1 ORF044, <i>Staphylococcus</i> phage 37 (70/134, 52%, 134)                                                      |                                             | family:vir_proph:1230<br>phi:0000326 - phage function unknown<br>mge:1602, 37, <i>S. aureus</i>                                                                                                              |
| 28 | + | 15331..15792 | 153 | 17,8 |                                              | no hits found                                                                                                              |                                             | no hits found                                                                                                                                                                                                |
| 29 | + | 15903..16328 | 141 | 16   | TerS                                         | ZP_07844472.1, prophage LambdaCh01, terminase, small subunit, <i>S. hominis</i> subsp. <i>hominis</i> C80 (95/139,68%,142) | PF03592:Terminase2, terminase small subunit | family:vir_proph:45<br>phi:0000074 - phage terminase small subunit; phi:0000019 - phage DNA maturation; go:0003677 - DNA binding<br><br>mge:2655, prophinder:43224,                                          |

|    |   |              |     |      |                                    |                                                                                                         |                                                          |                                                                                                                                                                                                           |
|----|---|--------------|-----|------|------------------------------------|---------------------------------------------------------------------------------------------------------|----------------------------------------------------------|-----------------------------------------------------------------------------------------------------------------------------------------------------------------------------------------------------------|
| 30 | + | 16482..17621 | 379 | 44,3 | TerL                               | YP_004148742.1, Phage terminase, large subunit, <i>S. pseudintermedius</i> HKU10-03 (318/376, 85%, 424) | PF04466 : Terminase3                                     | <i>Streptococcus pyogenes</i> MGAS6180<br>family:vir_proph:15<br>phi:0000019 - phage DNA maturation;<br>phi:0000073 - phage terminase large subunit<br>mge:2670, prophinder:45952, <i>S. aureus</i> RF122 |
| 31 | + | 17622..19073 | 483 | 55,8 | portal protein*                    | YP_004148743.1, Phage portal protein, <i>S. pseudintermedius</i> HKU10-03(345/469 , 74%, 481)           | PF05133: phage prot Gp6 (portal protein SPP1 Gp6-like)   | family:vir_proph:52<br>phi:0000012 - phage head tail joining;<br>phi:0000068 - phage portal protein<br>mge:1557, 187, <i>S. aureus</i>                                                                    |
| 32 | + | 19057..20094 | 348 | 39,6 | minor head protein                 | YP_239491.1, ORF009 , <i>Staphylococcus</i> phage 187 (214/340,63%,322)                                 | PF04233:phage Mu F protein, possible minor head proteins | family:vir_proph:50<br>phi:0000185 - phage head/capsid minor protein<br>mge:1557, 187, <i>S. aureus</i>                                                                                                   |
| 33 | + | 20330..20935 | 201 | 22,7 | scaffold protein                   | YP_003472468.1, hypothetical protein SLGD_02253, <i>S. lugdunensis</i> HKU09-01 (120/197, 61%, 196)     |                                                          | family:vir_proph:103<br>phi:0000017 - phage prohead/capsid assembly; phi:0000065 - capsid scaffolding protein<br>mge:1557, 187, <i>S. aureus</i>                                                          |
| 34 | + | 20951..21862 | 303 | 33   | major head protein*                | YP_003472467.1, Phage major capsid protein Fam0118, <i>S. lugdunensis</i> HKU09-01 (214/298, 72%, 301)  |                                                          | family:vir_proph:527<br>phi:0000326 - phage function unknown<br>mge:1557, 187, <i>S. aureus</i>                                                                                                           |
| 35 | + | 21890..22225 | 111 | 12,9 | DNA packaging , minor head protein | YP_239495.1, ORF042, <i>Staphylococcus</i> phage 187 (69/111, 62%, 128)                                 | PF05135:Phage QLRG putative DNA packaging                | family:vir_proph:160<br>phi:0000186 - minor capsid structural protein<br>mge:1557, 187, <i>S. aureus</i>                                                                                                  |
| 36 | + | 22222..22536 | 104 | 12,3 | minor head protein                 | YP_239496.1, ORF107, <i>Staphylococcus</i> phage 187 (49/102, 48%, 104)                                 |                                                          | family:vir_proph:277<br>phi:0000186 - minor capsid structural protein<br>mge:1557, 187, <i>S. aureus</i>                                                                                                  |
| 37 | + | 22526..22876 | 116 | 13,7 |                                    | YP_239497.1, ORF049, <i>Staphylococcus</i> phage 187 (78/115, 68%, 115)                                 | PF04883:DUF646, possible tail component                  | family:vir_proph:76<br>phi:0000326 - phage function unknown<br>mge:1557, 187, <i>S. aureus</i>                                                                                                            |
| 38 | + | 22884..23282 | 132 | 14,9 | head structural protein            | YP_239498.1 , ORF039, <i>Staphylococcus</i> phage 187 (54/131, 41%, 131)                                |                                                          | family:vir_proph:215<br>phi:0000173 - major capsid structural protein<br>mge:1557, 187, <i>S. aureus</i>                                                                                                  |
| 39 | + | 23297..23896 | 199 | 22,2 | major tail protein*                | YP_417178.1, phage-like protein, <i>S. aureus</i> RF122 (119/184, 65%, 193)                             | PF06199: phage tail 2, major tail proteins               | family:vir_proph:196<br>phi:0000082 - phage major tail protein<br>mge:2670, prophinder:45952, <i>S. aureus</i>                                                                                            |

|    |   |              |      |       |                                                   |                                                                                                                    |                                                                              |                                                                                                                                                                         |
|----|---|--------------|------|-------|---------------------------------------------------|--------------------------------------------------------------------------------------------------------------------|------------------------------------------------------------------------------|-------------------------------------------------------------------------------------------------------------------------------------------------------------------------|
|    |   |              |      |       |                                                   |                                                                                                                    |                                                                              | RF122                                                                                                                                                                   |
| 40 | + | 23965..24336 | 123  | 13,5  | tail assembly protein                             | YP_239500.1, ORF043, <i>Staphylococcus</i> phage 187 (61/114, 54%, 126)                                            | PF12363 : phage protein                                                      | family:vir_proph:209<br>phi:000015 - phage tail assembly<br>mge:1557, 187, <i>S. aureus</i>                                                                             |
| 41 | + | 24366..24731 | 121  | 14,4  |                                                   | YP_004148754.1, hypothetical protein SPSINT_0589, <i>S. pseudintermedius</i> HKU10-03 (72/116, 62%, 116)           |                                                                              | family:vir_proph:210<br>phi:0000326 - phage function unknown<br>mge:1557, 187, <i>S. aureus</i>                                                                         |
| 42 | + | 24731..28123 | 1130 | 121,2 | tail tape measure protein*                        | YP_254260.1 hypothetical protein SH2345, <i>S. haemolyticus</i> JCSC1435 (482/1027, 47%, 1070)                     |                                                                              | family:vir_proph:1<br>phi:0000086 - phage tail tape measure protein<br>mge:2149, prophinder:46506, <i>S. haemolyticus</i> JCSC1435                                      |
| 43 | + | 28136..29092 | 318  | 37,4  | tail protein*                                     | ZP_03614373.1, conserved hypothetical protein, <i>S. capitis</i> SK14 (205/317, 65%, 318)                          | PF05709: Siphon tail, phage tail protein                                     | family:vir_proph:190<br>phi:0000178 - phage minor tail protein<br>mge:1654, 85, <i>S. aureus</i>                                                                        |
| 44 | + | 29102..30352 | 416  | 47    | tail protein, endopeptidase*                      | ZP_03614382.1, conserved phage protein, <i>S. capitis</i> SK14 (222/383, 58%, 486)                                 | PF06605: prophage endopeptidase tail                                         | family:vir_proph:35<br>phi:0000178 - phage minor tail protein;<br>go:0016298 - lipase activity<br>mge:2332, prophinder:45292, <i>S. aureus</i> subsp. <i>aureus</i> JH9 |
| 45 | + | 30363..32237 | 624  | 71,5  | tail protein, Zn carboxypeptidase*                | ZP_03614336.1, zinc carboxypeptidase family, <i>S. capitis</i> SK14 (434/614, 71%, 628)                            | PF00246: peptidase M14                                                       | family:vir_proph:458<br>phi:0000178 - phage minor tail protein<br>mge:1602, 37, <i>S. aureus</i>                                                                        |
| 46 | + | 32250..33446 | 398  | 45,3  | tail protein, likely tail fiber*                  | ZP_03614350.1, conserved hypothetical protein, <i>S. capitis</i> SK14 (237/391, 61%, 395)                          | PF10651 : DUF2479, unknown function                                          | family:vir_proph:69<br>phi:0000178 - phage minor tail protein<br>mge:2149, prophinder:46506, <i>S. haemolyticus</i> JCSC1435                                            |
| 47 | + | 33468..33959 | 163  | 18,4  | holin                                             | YP_002560381.1, holin, <i>M. caseolyticus</i> JCSC5402 (81/152, 53%, 170)                                          | PF05105: phage holin 4                                                       | family:vir_proph:42<br>phi:0000088 - phage base plate protein;<br>go:0034290 - holin activity<br>mge:169, 44AHJD, <i>S. aureus</i>                                      |
| 48 | + | 34009..35946 | 645  | 72,8  | peptidoglycan hydrolase, tail associated protein* | ZP_03614366.1, mannosyl-glycoprotein endo-beta-N-acetylglucosaminidase, <i>S. capitis</i> SK14 (389/644, 60%, 626) | PF05257: CHAP domain<br>PF01832: glucosaminidase                             | family:vir_proph:6<br>phi:0000013 - phage release by lysis;<br>phi:0000340 - phage cell wall amidase activity<br>mge:2670, prophinder:45952, <i>S. aureus</i> RF122     |
| 49 | + | 35999..37345 | 448  | 49,6  | tail protein, likely tail fiber*                  | ZP_03614374.1, tail fiber protein, <i>S. capitis</i> SK14 (144/258, 56%, 552)                                      | PF10651: DUF2479, unknown function;<br>PF01391: collagen triple helix repeat | family:vir_proph:199<br>phi:0000178 - phage minor tail protein<br>mge:1602, 37, <i>S. aureus</i>                                                                        |



|    |   |              |     |      |       |                                                                                                                   |                                                                         |                                                                                                                                                                                         |
|----|---|--------------|-----|------|-------|-------------------------------------------------------------------------------------------------------------------|-------------------------------------------------------------------------|-----------------------------------------------------------------------------------------------------------------------------------------------------------------------------------------|
| 50 | + | 37406..37702 | 98  | 11,2 |       | ZP_06614673.1, conserved hypothetical protein, <i>S. epidermidis</i> M23864:W2(grey) (69/98, 70%, 114)            |                                                                         | family:vir_proph:1391<br>phi:0000326 - phage function unknown<br>mge:1571, CNPH82, <i>S. epidermidis</i>                                                                                |
| 51 | + | 37695..37838 | 47  | 57,5 |       | ZP_06614674.1, conserved hypothetical protein, <i>S. epidermidis</i> M23864:W2(grey) (37/42, 88%, 48)             | PF09693: phage XkdX                                                     | family:vir_proph:1045<br>phi:0000326 - phage function unknown<br>mge:1571, CNPH82, <i>S. epidermidis</i>                                                                                |
| 52 | + | 37894..38181 | 95  | 10,4 | holin | ZP_04824946.1, possible holin, <i>S. epidermidis</i> BCM-HMP0060 (52/95, 55%, 95)                                 | PF04531: phage holin 1                                                  | family:vir_proph:34<br>go:0034290 - holin activity;<br>phi:0000013 - phage release by lysis<br><br>mge:1859, A006, <i>Listeria monocytogenes</i>                                        |
| 53 | + | 38194..39930 | 578 | 66,2 | lysin | ZP_04824947.1, possible N-acetylmuramoyl-L-alanine amidase, <i>S. epidermidis</i> BCM-HMP0060 (428/578, 74%, 574) | PF01510: Amidase 2, N-acetylmuramoyl-L-alanine amidase<br>PF05257: CHAP | family:vir_proph:6<br>phi:0000013 - phage release by lysis;<br>phi:0000340 - phage cell wall amidase activity<br>mge:2256, prophinder:42793, <i>S. aureus</i> subsp. <i>aureus</i> N315 |

\*Proteins identified in proteomic analysis

**Table S4: Genome annotation of StB20**

| ORF | Strand | Start..end | Size |      | predicted function          | NCBI best match<br>(extent , % aa identity, total length aa)                                                   | Domain                                                            | Prot family<br>Func Annot<br>Mgeld, MgeName, Hosts                                                                                                                                                                 |
|-----|--------|------------|------|------|-----------------------------|----------------------------------------------------------------------------------------------------------------|-------------------------------------------------------------------|--------------------------------------------------------------------------------------------------------------------------------------------------------------------------------------------------------------------|
|     |        |            | aa   | kDa  |                             |                                                                                                                |                                                                   |                                                                                                                                                                                                                    |
| 1   | -      | 97..1401   | 434  | 51,2 | integrase                   | YP_950630.1, putative site-specific recombinase, <i>Staphylococcus</i> phage CNPH82 (380/407, 93%, 458)        | PF00239: resolvase, N-terminal domain; PF07508: recombinase       | family:vir_proph:67<br>phi:0000330 - site-specific DNA inversion, phi:0000056 - prophage DNA integration, phi:0000144 - serine-based site-specific recombinase activity<br>mge:1571, CNPH82, <i>S. epidermidis</i> |
| 2   | -      | 1470..2393 | 307  | 34,2 |                             | EGG74041.1, putative lipoprotein, <i>S. epidermidis</i> VCU028 (238/291, 82%, 314)                             |                                                                   | family:vir_proph:22<br>phi:0000326 - phage function unknown<br>mge:1508, 88, <i>S. aureus</i>                                                                                                                      |
| 3   | -      | 2445..2585 | 46   | 5,8  |                             | YP_254310.1, hypothetical protein SH2395, <i>S. haemolyticus</i> JCSC1435 (34/41, 83%, 45)                     |                                                                   | family:vir_proph:6557<br>no functions assigned<br>mge:2149, prophinder:46506, <i>S. haemolyticus</i> JCSC1435                                                                                                      |
| 4   | -      | 2597..3313 | 238  | 27,1 | transcription repressor     | EGA99200.1, hypothetical protein SAO46_2483, <i>S. aureus</i> O46 (176/238, 74%, 237)                          | PF01381:HTH_3, Cro and CI family; PF00717:peptidase S24           | family:vir_proph:378<br>go:0016564 - transcription repressor activity<br>mge:2685, prophinder:45206, <i>S. aureus</i> subsp. <i>aureus</i> USA300                                                                  |
| 5   | +      | 3450..3719 | 89   | 10,5 | transcription repressor     | EGA99199.1, putative phage transcriptional regulator, <i>S. aureus</i> O46 (85/89, 96%, 89)                    | PF01381: HTH_, Cro and CI family                                  | family:vir_proph:378<br>go:0016564 - transcription repressor activity<br>mge:2685, prophinder:45206, <i>S. aureus</i> subsp. <i>aureus</i> USA300                                                                  |
| 6   | +      | 3733..4452 | 239  | 27,3 | transcription antirepressor | ADI97590.1, prophage, antirepressor, putative, <i>S. aureus</i> subsp. <i>aureus</i> ED133 (188/238, 79%, 237) | PF10552:BRO family, N-terminal domain<br>PF02498.10: ORF6C domain | family:vir_proph:3<br>phi:0000048 - negative transcriptional regulation of phage gene expression, go:0016564 - transcription repressor activity<br>mge:1676, 92, <i>S. aureus</i>                                  |
| 7   | +      | 4478..4642 | 54   | 6,1  |                             | ZP_07841352.1, hypothetical protein HMPREF0786_00897, <i>S. caprae</i> C87 (51/53, 96%, 54)                    |                                                                   | no hits found                                                                                                                                                                                                      |
| 8   | +      | 4639..4743 | 34   | 4,1  |                             | ZP_06284324.1, conserved domain protein, <i>S. epidermidis</i> SK135 (31/34, 91%, 56)                          |                                                                   | family:vir_proph:1390<br>phi:0000326 - phage function unknown<br>mge:1679, PH15, <i>S. epidermidis</i>                                                                                                             |

|    |   |              |     |      |                                                          |                                                                                                                                      |                                                                                                                    |                                                                                                                                                                        |
|----|---|--------------|-----|------|----------------------------------------------------------|--------------------------------------------------------------------------------------------------------------------------------------|--------------------------------------------------------------------------------------------------------------------|------------------------------------------------------------------------------------------------------------------------------------------------------------------------|
| 9  | + | 4740..4916   | 58  | 6,7  |                                                          | YP_950705.1, hypothetical protein ph43, <i>Staphylococcus</i> phage PH15 (54/58, 93%, 58)                                            |                                                                                                                    | family:vir_proph:10541<br>no functions assigned<br>mge:1679, PH15, <i>S. epidermidis</i>                                                                               |
| 10 | + | 4971..5246   | 91  | 11   |                                                          | YP_950638.1, hypothetical protein cn40, <i>Staphylococcus</i> phage CNPH82 (86/91, 95%, 91)                                          |                                                                                                                    | family:vir_proph:5007<br>no functions assigned<br>mge:1571, CNPH82, <i>S. epidermidis</i>                                                                              |
| 11 | + | 5218..5445   | 75  | 8,5  |                                                          | EGG72642.1 hypothetical protein SEVCU028_0999, <i>S. epidermidis</i> VCU028 (64/75, 85%, 75)                                         | PF10656: DUF2483, domain of unknown function                                                                       | family:vir_proph:259<br>phi:0000326 - phage function unknown<br>mge:1607, 69, <i>S. aureus</i>                                                                         |
| 12 | + | 5438..6082   | 214 | 24,6 | recombination protein, ERF-like recombinase              | ZP_04824890.1, conserved hypothetical protein <i>S. epidermidis</i> BCM-HMP0060 (204/214, 95%, 214)                                  | PF04404: ERF superfamily                                                                                           | family:vir_proph:1389<br>phi:0000326 - phage function unknown, 580 - ERF-like recombinase<br>mge:1602, 37, <i>S. aureus</i>                                            |
| 13 | + | 6082..6492   | 136 | 15   | recombination protein, single-strand DNA binding protein | ZP_06612891.1, single-strand binding protein <i>S. epidermidis</i> M23864:W2(grey) (131/140, 94%, 140)                               | PF00436: SSB, single-strand binding protein family                                                                 | family:vir_proph:30<br>go:0003697 - single-stranded DNA binding<br>mge:1571, CNPH82, <i>S. epidermidis</i>                                                             |
| 14 | + | 6596..7057   | 153 | 17,8 | HNH endonuclease                                         | YP_002633575.1 putative HNH family endonuclease, phage associated, <i>S. camosus</i> subsp. <i>camosus</i> TM300 (109/151, 72%, 183) | PF13392: HNH_3, HNH endonuclease                                                                                   | family:vir_proph:27<br>go:0004530 - deoxyribonuclease I activity<br>mge:1508, 88, <i>S. aureus</i>                                                                     |
| 15 | + | 7058..7732   | 224 | 26,1 |                                                          | EGG69330.1, hypothetical protein SEVCU028_0950, <i>S. epidermidis</i> VCU028 (198/224, 88%, 229)                                     | PF06147:DUF968, domain of unknown function                                                                         | family:vir_proph:66<br>phi:0000326 - phage function unknown<br>mge:1679, PH15, <i>S. epidermidis</i>                                                                   |
| 16 | + | 7725..8525   | 266 | 31,1 | replication initiation protein                           | EGS74699.1, phage replisome organizer N-terminal domain protein, <i>S. epidermidis</i> VCU107 (259/266, 97%, 266)                    | PF09681: N-terminal phage replisome organizer;<br>PF07261: DnaB_2, replication, initiation and membrane attachment | family:vir_proph:10<br>go:0006270 - DNA replication initiation, phi:0000026 - phage DNA replication, go:0003677 - DNA binding<br>mge:1679, PH15, <i>S. epidermidis</i> |
| 17 | + | 8525..8884   | 119 | 14,2 |                                                          | YP_950712.1, YP_950712.1 conserved phage protein <i>Staphylococcus</i> phage PH15 (118/119, 99%, 119)                                |                                                                                                                    | family:vir_proph:738<br>phi:0000326 - phage function unknown<br>mge:1679, PH15, <i>S. epidermidis</i>                                                                  |
| 18 | + | 8877..10112  | 411 | 47,3 | helicase                                                 | EGS74699.1, phage replisome organizer N-terminal domain protein, <i>S. epidermidis</i> VCU107 (259/266, 97%, 266)                    | PF03796: DnaB_C, DnaB-like helicase C terminal domain                                                              | family:vir_proph:24<br>phi:0000026 - phage DNA replication, go:0004386 - helicase activity<br>mge:1679, PH15, <i>S. epidermidis</i>                                    |
| 19 | + | 10109..10330 | 73  | 8,7  |                                                          | YP_950714.1, hypothetical protein ph52 <i>Staphylococcus</i> phage PH15 (71/73, 97%, 73)                                             |                                                                                                                    | family:vir_proph:737<br>phi:0000326 phage function unknown<br>mge:1679, PH15, <i>S. epidermidis</i>                                                                    |

|    |   |              |     |      |         |                                                                                                                                                                                  |                                                                                         |                                                                                                                                                                                                                         |
|----|---|--------------|-----|------|---------|----------------------------------------------------------------------------------------------------------------------------------------------------------------------------------|-----------------------------------------------------------------------------------------|-------------------------------------------------------------------------------------------------------------------------------------------------------------------------------------------------------------------------|
| 20 | + | 10308..10553 | 81  | 9,7  |         | EGS38355.1, hypothetical protein SEVCU116_0394 <i>S. epidermidis</i> VCU116 (75/81, 93%, 81)                                                                                     | PF11673: DUF3269, unknown function                                                      | family:vir_proph:5008<br>no functions assigned<br>mge:1679 - PH15, <i>S. epidermidis</i>                                                                                                                                |
| 21 | + | 10562..10969 | 135 | 16,3 |         | EGS38373.1, hypothetical protein SEVCU116_0393 <i>S. epidermidis</i> VCU116 (120/123, 98%, 136)                                                                                  | PF06356: DUF1064, domain of unknown function                                            | family:vir_proph:97<br>phi:0000326 - phage function unknown<br>mge:102, phiPV83, <i>S. aureus</i>                                                                                                                       |
| 22 | + | 10962..11156 | 64  | 7,5  |         | ZP_04818984.1, conserved hypothetical protein <i>S. epidermidis</i> M23864:W1 (59/64, 92%, 64)                                                                                   |                                                                                         | family:vir_proph:11021<br>no functions assigned<br>mge:1571, CNPH82, <i>S. epidermidis</i>                                                                                                                              |
| 23 | + | 11157..11522 | 121 | 14,7 |         | EGS38387.1, PVL ORF-50-like family protein, <i>S. epidermidis</i> VCU116 (110/121, 91%, 121)                                                                                     | PF07768:<br>PVL_ORF50, PVL ORF-50-like family                                           | family:vir_proph:73<br>no functions assigned<br>mge:1679, PH15, <i>S. epidermidis</i>                                                                                                                                   |
| 24 | + | 11523..11720 | 65  | 7,7  |         | EGS40333.1, hypothetical protein SEVCU116_1798, <i>S. epidermidis</i> VCU116 (59/65, 91%, 65)                                                                                    |                                                                                         | no hits found                                                                                                                                                                                                           |
| 25 | + | 11723..12202 | 159 | 18,4 |         | EGS40327.1, hypothetical protein SEVCU116_1797, <i>S. epidermidis</i> VCU116 (147/158, 93%, 159)                                                                                 | PF05014:<br>Nuc_deoxyrib_tr, nucleoside deoxyribosyltransferase (pyrimidine metabolism) | family:vir_proph:1693<br>phi:0000326, phage function unknown<br>mge:1577, G1, <i>S. aureus</i>                                                                                                                          |
| 26 | + | 12199..12384 | 61  | 7,2  |         | YP_950654.1, hypothetical protein cn56 <i>Staphylococcus</i> phage CNPH82 (53/61, 87%, 61)                                                                                       |                                                                                         | family:vir_proph:3305<br>no functions assigned<br>mge:1571, CNPH82, <i>S. epidermidis</i>                                                                                                                               |
| 27 | + | 12381..12641 | 86  | 9,9  |         | ZP_04824909.1, hypothetical protein HMPREF0789_0717, <i>S. epidermidis</i> BCM-HMP0060 (36/46, 78%, 50)                                                                          |                                                                                         | family:vir_proph:153<br>phi:0000326, phage function unknown<br>mge:2642, prophinder:45328, <i>S. aureus</i> subsp. <i>aureus</i> Mu3                                                                                    |
| 28 | + | 12625..12804 | 59  | 7,2  |         | no hits found                                                                                                                                                                    |                                                                                         | no hits found                                                                                                                                                                                                           |
| 29 | + | 12806..13231 | 141 | 15,6 | dUTPase | ZP_03614365.1, deoxyuridine 5'-triphosphate nucleotidohydrolase (dutpase) (dutp pyrophosphatase) (ppar-interacting protein 4) (Pip4), <i>S. capitis</i> SK14 (134/141, 95%, 141) | PF00692:dUTPase                                                                         |                                                                                                                                                                                                                         |
| 30 | + | 13280..13462 | 60  | 7,4  | RinB    | ZP_06612912.1, regulator RinB, <i>S. epidermidis</i> M23864:W2(grey) (55/60, 92%, 59)                                                                                            | PF06116: RinB, transcriptional activator                                                | family:vir_proph:83<br>phi:0000007 - phage lysogeny, go:0016563 - transcription activator activity, phi:0000049 - positive transcriptional regulation of phage gene expression<br>mge:1679, PH15, <i>S. epidermidis</i> |

|    |   |              |     |      |                     |                                                                                                              |                                                        |                                                                                                                                                                                                                  |
|----|---|--------------|-----|------|---------------------|--------------------------------------------------------------------------------------------------------------|--------------------------------------------------------|------------------------------------------------------------------------------------------------------------------------------------------------------------------------------------------------------------------|
| 31 | + | 13463..13612 | 49  | 5,8  |                     | ZP_06612913.1, hypothetical protein HMPREF0794_0195, <i>S. epidermidis</i> M23864:W2(grey) (49/49, 100%, 49) | PF07438: DUF1514, domain of unknown function           | no hits found                                                                                                                                                                                                    |
| 32 | + | 13629..14075 | 148 | 17,6 |                     | ZP_07841334.1, hypothetical protein HMPREF0786_00879, <i>S. caprae</i> C87 (145/148, 98%, 148)               |                                                        | family:vir_proph:63<br>phi:0000007 - phage lysogeny, go:0016563 - transcription activator activity, phi:0000049 - positive transcriptional regulation of phage gene expression<br>mge:1476, 77, <i>S. aureus</i> |
| 33 | + | 14677..15054 | 125 | 15,2 | HNH endonuclease    | ZP_07841333.1, prophage L54a, HNH endonuclease family protein <i>S. caprae</i> C87 (116/124, 94%, 125)       | PF01844:HNH endonuclease                               | family:vir_proph:9<br>go:0004530 - deoxyribonuclease I activity<br>mge:57, phiSLT, <i>S. aureus</i>                                                                                                              |
| 34 | + | 15083..15220 | 45  | 5    |                     | no hits found                                                                                                |                                                        | no hits found                                                                                                                                                                                                    |
| 35 | + | 15199..15669 | 156 | 18   | TerS                | EGG63311.1, phage terminase, small subunit, P27 family <i>S. epidermidis</i> VCU144] (155/156, 99%, 156)     | PF05119: Terminase_4, phage terminase, small subunit   | family:vir_proph:44<br>phi:0000074 - phage terminase small subunit, go:0003677 - DNA binding<br>mge:2140, prophinder:45399, <i>S. saprophyticus</i> subsp. <i>saprophyticus</i> ATCC 15305                       |
| 36 | + | 15656..17413 | 585 | 67,9 | TerL                | EGG63322.1, putative phage terminase, large subunit <i>S. epidermidis</i> VCU144 (596/583, 98%, 583)         | PF03354: Terminase_1, phage terminase, large subunit   | family:vir_proph:8<br>phi:0000019 - phage DNA maturation, phi:0000073 - phage terminase large subunit, mge:2556, prophinder:46163, <i>Streptococcus pyogenes</i> SSI-1                                           |
| 37 | + | 17427..17621 | 64  | 7    |                     | EGG63233.1, hypothetical protein SEVCU144_2382 <i>S. epidermidis</i> VCU144 (60/64, 94%, 65)                 |                                                        | no hits found                                                                                                                                                                                                    |
| 38 | + | 17624..18856 | 410 | 46,5 | portal HK97 family* | ZP_06612919.1, conserved hypothetical protein <i>S. epidermidis</i> M23864:W2(grey) (402/410, 988%, 410)     | PF04860: phage portal protein                          | family:vir_proph:7<br>phi:0000012 - phage head tail joining, phi:0000068 - phage portal protein<br>mge:1875, tp310-3, <i>S. aureus</i> 410                                                                       |
| 39 | + | 18846..19403 | 185 | 20,9 | prohead protease    | ZP_07841328.1, phage prohead protease, HK97 family, <i>S. caprae</i> C87 (179/185, 97%, 188)                 | PF04586.10: peptidase U35, caudovirus prohead protease | family:vir_proph:21<br>phi:0000017 - phage prohead/capsid assembly , phi:0000123 - prohead protease activity<br>mge:2494, prophinder:43759, <i>S. aureus</i> subsp. <i>aureus</i> MSSA476                        |
| 40 | + | 19445..20803 | 452 | 50,4 | major head protein* | ZP_06612921.1, prophage pi2 protein 33 <i>S. epidermidis</i> M23864:W2(grey) (408/452, 90%, 451)             | PF05065: phage capsid proteins (HK97, phi-105, P27,    | family:proph:20<br>phi:0000066 - phage head/capsid major protein                                                                                                                                                 |

|    |   |              |     |      |                                 |                                                                                                                                     |  |                                                                      |  |  |                    |                                                                                                                                                  |
|----|---|--------------|-----|------|---------------------------------|-------------------------------------------------------------------------------------------------------------------------------------|--|----------------------------------------------------------------------|--|--|--------------------|--------------------------------------------------------------------------------------------------------------------------------------------------|
|    |   |              |     |      |                                 |                                                                                                                                     |  |                                                                      |  |  | and related phage) | mge:2187, prophinder:46329, <i>Listeria innocua</i> Clp11262                                                                                     |
| 41 | + | 20822..21163 | 113 | 13   | DNA packaging protein           | EGG63250.1, DNA packaging protein, QLRG family <i>S. epidermidis</i> VCU144 (107/113, 95%, 113)                                     |  | PF05135: Phage_connect_1, phage gp6-like head-tail connector protein |  |  |                    | family:vir_proph:152<br>phi:0000326 - phage function unknown<br>mge:2568, prophinder:42609, <i>Rhodobacter sphaeroides</i> 2.4.1                 |
| 42 | + | 21153..21482 | 109 | 12,2 | phage head-tail joining protein | ZP_07841325.1, hypothetical protein HMPREF0786_00870, <i>S. caprae</i> C87 (109/109, 100%, 109)                                     |  | PF05521: Phage_H_T_join, phage head-tail joining protein             |  |  |                    | family:vir_proph:111<br>phi:0000326 - phage function unknown<br>mge:2431, prophinder:45259, <i>S. aureus</i> subsp. <i>aureus</i> JH1            |
| 43 | + | 21617..21883 | 88  | 10,4 |                                 | ZP_07841324.1, hypothetical protein HMPREF0786_00869, <i>S. caprae</i> C87 (88/88, 100%, 88)                                        |  |                                                                      |  |  |                    | family:vir_proph:220<br>phi:0000326 - phage function unknown<br>mge:2148, prophinder:46504, <i>S. haemolyticus</i> JCSC1435                      |
| 44 | + | 21903..22292 | 129 | 15,4 |                                 | EGG63239.1, hypothetical protein SEVCU144_2375 <i>S. epidermidis</i> VCU144 (126/129, 98%, 134)                                     |  |                                                                      |  |  |                    | family:vir_proph:219<br>phi:0000326 - phage function unknown<br>mge:1476, 77, <i>S. aureus</i>                                                   |
| 45 | + | 22305..22934 | 209 | 22,8 | major tail protein*             | EGG63212.1, phage major tail protein, phi13 family <i>S. epidermidis</i> VCU144 (208/209, 99%, 209)                                 |  | PF04630: phage_tail, phage major tail protein                        |  |  |                    | family:vir_proph:39<br>phi:0000082 - phage major tail protein<br>mge:2494, prophinder:43759, <i>S. aureus</i> subsp. <i>aureus</i> MSSA476       |
| 46 | + | 22953..23138 | 61  | 7,1  |                                 | EGG63234.1, hypothetical protein SEVCU144_2373 <i>S. epidermidis</i> VCU144 (61/61, 100%, 61)                                       |  |                                                                      |  |  |                    | family:vir_proph:107<br>phi:0000326 - phage function unknown<br>mge:1571, CNPH82, <i>S. epidermidis</i>                                          |
| 47 | + | 23202..23564 | 120 | 13,7 |                                 | ZP_07841320.1, hypothetical protein HMPREF0786_00865, <i>S. caprae</i> C87 (116/120, 97%, 120)                                      |  |                                                                      |  |  |                    | family:vir_proph:574<br>phi:0000326 - phage function unknown<br>mge:2148, prophinder:46504, <i>S. haemolyticus</i> JCSC1435                      |
| 48 | + | 23597..23749 | 50  | 5,8  |                                 | ZP_06612929.1, hypothetical protein HMPREF0794_0211, <i>S. epidermidis</i> M23864:W2(grey) (50/50, 100%, 50)                        |  |                                                                      |  |  |                    | no hits found                                                                                                                                    |
| 49 | + | 23778..25574 | 598 | 63,5 | tail tape measure protein*      | ZP_06612930.1, conserved hypothetical protein <i>S. epidermidis</i> M23864:W2(grey) (567/585, 97%, 1586)                            |  | PF10145: phage_min_tail, phage-related minor tail protein            |  |  |                    | family:vir_proph:1<br>phi:0000086 - phage tail tape measure protein<br>mge:2494, prophinder:43759, <i>S. aureus</i> subsp. <i>aureus</i> MSSA476 |
| 50 | + | 25549..27282 | 577 | 62,7 | tail tape measure protein*      | ZP_07841318.1, phage tail tape measure protein, TP901 family, core region domain protein, <i>S. caprae</i> C87 (428/544, 79%, 1611) |  |                                                                      |  |  |                    | family:vir_proph:1<br>phi:0000086 - phage tail tape measure protein<br>mge:2148, prophinder:46504, <i>S. haemolyticus</i> JCSC1435               |

|    |   |              |     |      |                                    |                                                                                                         |                                                                                      |                                                                                                                                   |
|----|---|--------------|-----|------|------------------------------------|---------------------------------------------------------------------------------------------------------|--------------------------------------------------------------------------------------|-----------------------------------------------------------------------------------------------------------------------------------|
| 51 | + | 27234..28670 | 478 | 51,1 | tail tape measure protein          | EGS40310.1, peptidase, M23 family <i>S. epidermidis</i> VCU116 401/446, 90%,1906)                       | PF015551: Peptidase_M23, zinc metallopeptidase; PF01464: transglycosylase SLT domain | family:vir_proph:1<br>phi:000086 - phage tail tape measure protein<br>mge:2148, prophinder:46504, <i>S. haemolyticus</i> JCSC1435 |
| 52 | + | 28672..29505 | 277 | 32,5 | tail protein*                      | EGG63317.1, hypothetical protein SEVCU144_2369, <i>S. epidermidis</i> VCU144, (275/277, 99%, 277)       | PF05709: siphon tail, phage tail protein                                             | family:vir_proph:202<br>phi:0000174 - phage tail<br>mge:1485 - 3A, <i>S. aureus</i>                                               |
| 53 | + | 29506..31074 | 522 | 60,5 | tail protein, endopeptidase*       | ZP_06612932.1, conserved hypothetical protein <i>S. epidermidis</i> M23864:W2(grey) (513/522, 98%, 522) | PF06605:prophage tail, endopeptidase tail                                            | family:vir_proph:236<br>phi:0000174 - phage tail protein<br>mge:1855, tp310-2, <i>S. aureus</i>                                   |
| 54 | + | 31067..31240 | 57  | 6,7  |                                    | ZP_07841315.1, hypothetical protein HMPREF0786_00860, <i>S. caprae</i> C87 (56/57, 98%, 57)             |                                                                                      | no hits found                                                                                                                     |
| 55 | + | 31256..33118 | 620 | 71,4 | tail protein, Zn carboxypeptidase* | ZP_07841314.1, zinc carboxypeptidase superfamily <i>S. caprae</i> C87 (612/620, 99%, 620)               | PF00246: Peptidase_M14, Zn carboxypeptidase                                          | family:vir_proph:123<br>Peptidase_M14, Zn carboxypeptidase<br>mge:1531, 29, <i>S. aureus</i>                                      |
| 56 | + | 33118..34332 | 404 | 46,1 | tail protein, likely tail fiber*   | EGG63243.1, hypothetical protein SEVCU144_2365 <i>S. epidermidis</i> VCU144 (394/404, 98%, 404)         | PF10651: DUF2479, unknown function                                                   | family:vir_proph:69<br>phi:0000178 - phage minor tail protein<br>mge:2149, prophinder:46506, <i>S. haemolyticus</i> JCSC1435      |
| 57 | + | 34334..34960 | 208 | 23,8 |                                    | ZP_06612936.1, conserved hypothetical protein <i>S. epidermidis</i> M23864:W2(grey) (206/208, 99%, 211) | PF05908: DUF867, unknown function                                                    | family:vir_proph:1435<br>phi:0000326 - phage function unknown<br>mge:13, SPBc2, <i>Bacillus subtilis</i>                          |
| 58 | + | 34957..35382 | 141 | 15,7 |                                    | EGG63280.1, conserved domain protein, <i>S. epidermidis</i> VCU144 (141/141, 100%, 141)                 |                                                                                      | family:vir_proph:929<br>phi:0000326 - phage function unknown<br>mge:1602, 37, <i>S. aureus</i>                                    |
| 59 | + | 35369..35776 | 135 | 15,7 |                                    | ZP_07841310.1, conserved hypothetical protein <i>S. caprae</i> C87 (130/135, 96%, 146)                  |                                                                                      | family:vir_proph:199<br>phi:0000178 - phage minor tail protein<br>mge:1602, 37, <i>S. aureus</i>                                  |
| 60 | + | 35877..37259 | 460 | 51,8 | tail protein, likely tail fiber*   | ZP_07841309.1, putative phage tail fiber protein, <i>S. caprae</i> C87 (240/375, 64%, 543)              | PF10651:DUF2479, domain of unknown function; PF01391: collagen, collagen helix       | family:vir_proph:199<br>phi:0000178 - phage minor tail protein<br>mge:1642, EW, <i>S. aureus</i>                                  |
| 61 | + | 37271..37630 | 119 | 13,9 |                                    | ZP_06614673.1, conserved hypothetical protein <i>S. epidermidis</i> M23864:W2(grey) (52/91, 57%, 114)   |                                                                                      | family:vir_proph:1391<br>phi:0000326 - phage function unknown<br>mge:1602, 37, <i>S. aureus</i>                                   |
| 62 | + | 37623..37769 | 48  | 5,7  |                                    | ZP_06614674.1, conserved hypothetical protein <i>S. epidermidis</i> M23864:W2(grey) (43/48, 90%, 48)    | PF09693: Phage_XkdX, phage uncharacterized                                           | family:vir_proph:1045<br>phi:0000326 - phage function unknown<br>mge:1571, CNPH82, <i>S. epidermidis</i>                          |

|    |   |              |     |      |                         |                                                                                                           |                                                                                                   |                                                                                                                                                                              |
|----|---|--------------|-----|------|-------------------------|-----------------------------------------------------------------------------------------------------------|---------------------------------------------------------------------------------------------------|------------------------------------------------------------------------------------------------------------------------------------------------------------------------------|
| 63 | + | 37833..38243 | 136 | 14,7 | holin                   | ZP_07841307.1, holin, <i>S. caprae</i> C87 (125/136, 92%, 136)                                            | PF04531: phage holin1                                                                             | family:vir_proph:34<br>go:0034290 - holin activity<br>phi:0000013 - phage release by lysis<br>mge:2149, prophinder:46506, <i>S. haemolyticus</i> JCSC1435                    |
| 64 | + | 38218..38847 | 209 | 24   | lysin                   | ZP_07841306.1, autolysin (N-acetylmuramoyl-L-alanine amidase) <i>S. caprae</i> C87 (201/209, 96%, 487)    | PF05257: CHAP domain                                                                              | family:vir_proph:6<br>phi:0000013 - phage release by lysis,<br>phi:0000340 - phage cell wall amidase activity<br>mge:2149, prophinder:46506, <i>S. haemolyticus</i> JCSC1435 |
| 65 | + | 38909..39454 | 181 | 21,2 | homing HNH endonuclease | YP_240848.1, ORF027, <i>S. phage</i> X2 (133/181, 73%, 181)                                               | PF07463: NUMOD4, putative DNA-binding motif in homing endonucleases;<br>PF01844: HNH endonuclease | family:vir_proph:27<br>go:0004530 - deoxyribonuclease I activity<br>mge:1549, X2, <i>S. aureus</i>                                                                           |
| 66 | + | 39802..40614 | 270 | 30,8 | lysin                   | ZP_03614343.1, autolysin (N-acetylmuramoyl-L-alanine amidase), <i>S. capitis</i> SK14 (259/270, 96%, 487) | PF01510: amidase2, N-acetylmuramoyl-L-alanine amidase;<br>PF08460: SH3_5, bacterial SH3 domain    | family:vir_proph:6<br>phi:0000013 - phage release by lysis<br>phi:0000340 - phage cell wall amidase activity<br>mge:2149, prophinder:46506, <i>S. haemolyticus</i> JCSC1435  |

\*Proteins identified in proteomic analysis
